# Supplementary material
Source: Elsevier journal article supplement (https://www.sciencedirect.com/science/article/pii/S1889183719300017)
Supplement: mmc1 [file S1889183719300017:mmc1.pdf]

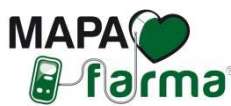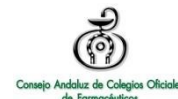

## Monitorización Ambulatoria de la Presión Arterial (MAPA)

### Hoja de Recogida de Datos del paciente

**Nº provincia (PP):**

**Nº Farmacia (FFFF):**

**Nº de colegiado** (del farmacéutico que se vaya a acreditar):

**Contacto del investigador** (Añade tu teléfono de contacto o tu correo electrónico):

#### DATOS DEL PACIENTE

**Nº de paciente:**

(Nº asignado, consecutivos desde 001. Cuidado de no duplicar)

**Fecha de realización del MAPA:**

**Nº de MAPA para ese paciente:**

(En caso de repetir el MAPA a un mismo paciente, ya registrado, anotar el nº de orden. Dato No obligatorio)

**Sexo:**

Hombre      Mujer

**Edad:**

**IMC:** \_\_\_\_\_ kg/m<sup>2</sup>

**Perímetro Abdominal:** \_\_\_\_\_ cm (Medida del contorno de la cintura a la altura del ombligo, en cm)

**¿Toma más de dos bebidas alcohólicas (vino, cerveza...) al día?:**

Sí      No

**¿Fumador?:**

Sí      No

**Colesterol Total:** \_\_\_\_\_ mg/dl (Última analítica o medida capilar antes de la prueba, en mg/dl)  
(Dato No obligatorio)

**¿Diabetes?**

Sí      No

**¿Antecedentes familiares de H.T.A.?:**

No  
Padre  
Madre  
Ambos

**¿Se ha manifestado la Enfermedad Vascular?:**

(Si ha padecido: IAM, angina de pecho, A.C.V., insuficiencia renal, enfermedad vascular periférica, etc.)

Sí      No

**Criterio de inclusión:**

Se selecciona una opción de entre los criterios de inclusión:

Sospecha de Hipertensión de Bata Blanca  
T.A. con mucha variabilidad en diferentes tomas aisladas en consulta o farmacia  
Paciente con mal control de la P.A. y con tratamiento farmacológico  
HTA grado I y riesgo CV bajo

**Nombre:**

**Teléfono:**

**Email:**

**Hora habitual de levantarse:**

**Hora habitual de acostarse:**

**¿Duerme siesta normalmente?**

**Horario de la siesta:**

Sospecha de HTA enmascarada  
Sospecha de episodios de Hipotensión (ancianos y diabéticos)  
Valoración de la efectividad terapéutica  
Pacientes de alto riesgo CV (enfermedad renal crónica, diabetes, episodios CV previos,...)  
HTA en embarazo o preeclamsia  
Sospecha de HTA secundaria  
Sospecha alteraciones del sueño (apnea)  
Obesidad y síndrome metabólico  
Otro: \_\_\_\_\_

**Medida de PAC antes de la MAPA:** (Dato No obligatorio)

**P.A. SISTÓLICA:** \_\_\_\_\_ mmHg

**P.A. DIASTÓLICA:** \_\_\_\_\_ mmHg

**FRECUENCIA CARDÍACA:** \_\_\_\_\_ ppm

**Si es > 65 años, se medirá además la PA y frecuencia cardíaca ortostática** (Dato No obligatorio)

(Medida que se realizará después de estar 1 minuto de pie y en esta postura)

**P.A. SISTÓLICA ORTOSTÁTICA:** \_\_\_\_\_ mmHg

**P.A. DIASTÓLICA ORTOSTÁTICA:** \_\_\_\_\_ mmHg

**FRECUENCIA CARDÍACA ORTOSTÁTICA:** \_\_\_\_\_ ppm

**¿Acepta la realización de la MAPA?:**

Sí No

**¿Toma algún tratamiento para la Hipertensión Arterial?:**

Sí No

**Tratamiento para la HTA** (Cumplimentar si la respuesta anterior es Sí)

Enumerar los Principios Activos que toma en cada comida aunque vayan en el mismo comprimido.

Si son más de uno, enumerarlos separados por un "+". Ej: enalapril+hidroclorotiazida+amlodipino

**Nombre genérico de los Principios Activos que toma en el DESAYUNO:**

**Nombre genérico de los Principios Activos que toma en el ALMUERZO:**

**Nombre genérico de los Principios Activos que toma en la CENA:**

**COLOCACIÓN DEL MAPA Y RETIRADA EL DÍA SIGUIENTE. Verificación de horas.**

Es muy importante confirmar que las horas de levantarse y acostarse han coincidido con lo programado, si no fue así hay que ajustar la hora real en el programa una vez descargados los datos del aparato.

En la pestaña "Opciones" / "Rangos de tiempo estadísticos", se debe ajustar a lo que ocurrió en la realidad.

**VALIDEZ DE LA PRUEBA**

**¿Finalización del MAPA correcta?**

Si se han registrado correctamente más del 70% de las mediciones y no han pasado menos de 2 horas consecutivas sin

ninguna medición

Sí No

**DATOS DEL MAPA (Copiar del Informe de MAPA):**

**MAPA P. A. SISTÓLICA - Media 24h:** \_\_\_\_\_ mmHg

**MAPA P. A. DIASTÓLICA - Media 24h:** \_\_\_\_\_ mmHg

**MAPA FRECUENCIA CARDÍACA - Media 24h:** \_\_\_\_\_ ppm

**MAPA P. A. SISTÓLICA - Media Actividad (Día):** \_\_\_\_\_ mmHg

**MAPA P. A. DIASTÓLICA - Media Actividad (Día):** \_\_\_\_\_ mmHg

**MAPA FRECUENCIA CARDÍACA - Media Actividad (Día):** \_\_\_\_\_ ppm

MAPA P. A. SISTÓLICA - Media Descanso (Nocturna): \_\_\_\_\_ mmHg  
MAPA P. A. DIASTÓLICA - Media Descanso (Nocturna): \_\_\_\_\_ mmHg  
MAPA FRECUENCIA CARDÍACA - Media Descanso (Nocturna): \_\_\_\_\_ ppm

CARGA DE LA PA SISTÓLICA (como PAS PTE%) Día:  
CARGA DE LA PA SISTÓLICA (como PAS PTE%) Noche:  
CARGA DE LA PA DIASTÓLICA (como PAD PTE%) Día:  
CARGA DE LA PA DIASTÓLICA (como PAD PTE%) Noche:

Profundidad Sistólica (PAS índice % D/N) Datos en %:  
Profundidad Diastólica (PAD índice % D/N) Datos en %:

**Clasificación:** según los datos de Profundidad (descenso relativo en la media de descanso o nocturna de la PA con respecto a la media de actividad o diurna)

DIPPER (entre 10-20%)

DIPPER EXTREMO (>20%)

NO-DIPPER (entre 0-10%)

RISER (< 0%, P.A. nocturna > P.A. diurna)

## ENCUESTA DE SATISFACCIÓN

¿Quién le ha indicado que se haga esta prueba?:

- El Farmacéutico de la Farmacia
- El Médico de Cabecera
- El Médico Especialista
- Un Familiar o Amigo

¿Cuál cree que es el lugar más accesible para hacerse este tipo de pruebas?:

- La Farmacia
- El Hospital
- El Centro de Salud
- Una consulta privada o Centro Médico

¿Ha tenido molestias durante la prueba?:

- Picores
- Irritación de la piel
- Exceso de presión del brazalete
- Sudoración excesiva
- Otras molestias

Intensidad de la molestia:

- Ninguna
- Molestia leve
- Molestia moderada
- Molestia insoportable

¿Recomendaría este servicio de la Farmacia a un familiar o amigo en sus mismas circunstancias?:

- Sí
- No

¿Cuál ha sido su satisfacción después de esta prueba, puntuando entre 1 y 10?:

|                  | 1                     | 2                     | 3                     | 4                     | 5                     | 6                     | 7                     | 8                     | 9                     | 10                    |                |
|------------------|-----------------------|-----------------------|-----------------------|-----------------------|-----------------------|-----------------------|-----------------------|-----------------------|-----------------------|-----------------------|----------------|
| Muy insatisfecho | <input type="radio"/> | Muy satisfecho |

Precio abonado el paciente por la realización de esta prueba diagnóstica: \_\_\_\_\_ euros

Tiempo total invertido en la provisión del servicio de MAPA: \_\_\_\_\_ minutos.

(Suma del tiempo invertido desde la entrevista inicial, programación y colocación del aparato, descarga, estudio y elaboración del informe)

**Gracias por participar en el Programa MAPAfarma, tus pacientes y tu profesión te lo agradecerán.**
