# Supplementary material
Source: Elsevier journal article supplement (https://www.sciencedirect.com/science/article/pii/S1889183719300017)
Supplement: mmc2 [file S1889183719300017:mmc2.pdf]

## **ANEXO. MEDIDA DE LA PRESIÓN ARTERIAL EN LA FARMACIA COMUNITARIA (PAFC)**

### **CONSIDERACIONES PREVIAS A LA MEDIDA DE LA PRESIÓN ARTERIAL AISLADA EN LA FARMACIA**

1. Elegir un ambiente tranquilo, confortable y a temperatura adecuada. Zona de atención personalizada (ZAP), de las farmacias.
2. Guardar reposo durante 5 min. antes de la medida al paciente.
3. No haber fumado, tomado café, té o alcohol o hecho ejercicio en los 30 min. previos a la medición.
4. Preferiblemente se indicaba al paciente realizar la medición con la vejiga vacía.
5. Las prendas de ropa no pueden comprimir la circulación en el brazo de medida.
6. Paciente correctamente sentado, brazo extendido y apoyado sobre una mesa. Los pies sobre el suelo, sin cruzar.

### **DESARROLLO DE LA MEDIDA**

Una toma en cada brazo, para elegir el brazo control del paciente.

- Si la diferencia es mayor de 20 mmHg, se repetían las medidas.
- Si la diferencia se mantiene, las medidas sucesivas se harán en el de mayor presión (brazo control).

Si la diferencia entre brazos es mayor del 20 mmHg, se utilizó como control para posteriores medidas en el paciente, el brazo no dominante del mismo.

Se tuvo en cuenta para excluirse lo anterior en mujeres mastectomizadas con edema.

Una vez seleccionado el brazo control del paciente, se procede a realizar 3 mediciones aisladas, descartando la primera y haciendo la media de las dos siguientes mediciones.
