# Supplementary material
Source: Elsevier journal article supplement (https://www.sciencedirect.com/science/article/pii/S1889183719300017)
Supplement: mmc3 [file S1889183719300017:mmc3.pdf]

## **ANEXO IV. VALIDACIÓN DEL APARATO PARA MAPA**

Omron M24/7 BP5

Tipo: Brazo

Modo de medida: Oscilométrico

Uso: Pacientes y clínico

Monitor de Presión Arterial Ambulatoria MAPA

Recomendación: Recomendado

Protocolos de Validación

ESH: Válido

AAMI: Válido

BHS: Válido

Características

- Ligero y silencioso para una máxima adaptación al paciente.
- Autonomía para más de 48 horas.
- Totalmente programable con Software basado en Windows.
- Con 2 manguitos Mediano y Grande SIN LATEX.
- Capacidad de memoria para más de 400 registros.
- Para más información: <http://www.peroxfarma.com/articulos/omron/monitor-de-presi%C3%B3n-arterial-ambulatoria-m247-bp5>

Bibliografía

Estudio BHS de Validación Clínica:

- Barna I, Keazei A, Dunai A. Evaluation of Meditech ABPM-04 ambulatory blood pressure measuring device according to the British Hypertension Society protocol. Blood Pressure Monitoring 1998; 3 : 363-368

- OMRON M24/7 BP5 posee un algoritmo equivalente al de Meditech ABPM-05 (ver Certificado de Equivalencia: <http://www.peroxfarma.com/files/fck/M247=Meditech.pdf>), y los modelos ABPM-05 y ABPM-04 de Meditech también usan el mismo algoritmo, por lo cual ambos están validados por la BHS

- Validación Sociedad Española de Hipertensión. Liga Española para la Lucha de la Hipertensión Arterial. Disponible: <https://www.seh-lelha.org/omron-m247-bp5/>
