# Supplementary material
Source: Elsevier journal article supplement (https://www.sciencedirect.com/science/article/pii/S1889183719300017)
Supplement: mmc4 [file S1889183719300017:mmc4.pdf]

|          |                                                                                                        |                                                                                                      |                                                                                                                                                  |
|----------|--------------------------------------------------------------------------------------------------------|------------------------------------------------------------------------------------------------------|--------------------------------------------------------------------------------------------------------------------------------------------------|
| Logo COF | Programa de formación y acreditación en<br>Monitorización Ambulatoria de la<br>Presión Arterial (MAPA) | MAPA  <b>farma</b> | <br>Consejo Andaluz de Colegios Oficiales<br>de Farmacéuticos |
|----------|--------------------------------------------------------------------------------------------------------|------------------------------------------------------------------------------------------------------|--------------------------------------------------------------------------------------------------------------------------------------------------|

# PROGRAMA DE FORMACIÓN Y ACREDITACIÓN EN MONITORIZACIÓN AMBULATORIA DE LA PRESIÓN ARTERIAL (MAPA) EN LAS FARMACIAS ANDALUZAS

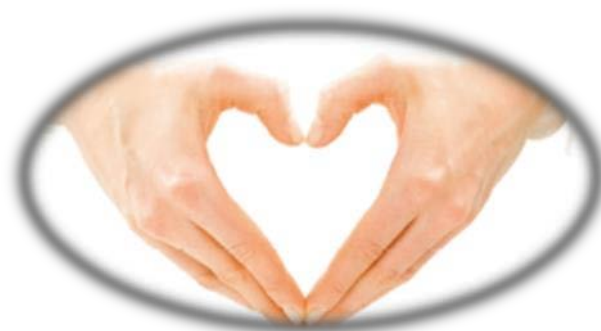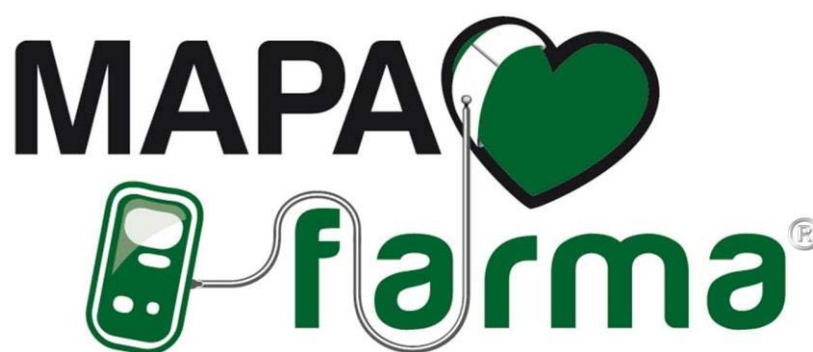

## PROCEDIMIENTO NORMALIZADO DE TRABAJO

|          |                                                                                                        |                |                                                                                                                                                  |
|----------|--------------------------------------------------------------------------------------------------------|----------------|--------------------------------------------------------------------------------------------------------------------------------------------------|
| Logo COF | Programa de formación y acreditación en<br>Monitorización Ambulatoria de la<br>Presión Arterial (MAPA) | MAPA<br>farma® | <br>Consejo Andaluz de Colegios Oficiales<br>de Farmacéuticos |
|----------|--------------------------------------------------------------------------------------------------------|----------------|--------------------------------------------------------------------------------------------------------------------------------------------------|

## ÍNDICE

|                                                               |         |
|---------------------------------------------------------------|---------|
| <b>1.- Objetivo</b>                                           | Pág. 3  |
| <b>2.- Definiciones</b>                                       | Pág. 3  |
| <b>3.- Criterios generales para la MAPA</b>                   | Pág. 3  |
| 3.1.- Criterios de inclusión del paciente                     | Pág. 3  |
| 3.2.- Criterios de exclusión del paciente                     | Pág. 3  |
| <b>4.- Equipamiento</b>                                       | Pág. 4  |
| <b>5.- Descripción del proceso:</b>                           | Pág. 4  |
| 5.1.- Información al paciente                                 | Pág. 4  |
| 5.2.- Autorización del paciente                               | Pág. 4  |
| 5.3.- Recogida de datos del paciente                          | Pág. 5  |
| 5.4.- Programación y colocación del dispositivo               | Pág. 5  |
| 5.5.- Retirada del dispositivo                                | Pág. 6  |
| 5.6.- Transferencia y almacenamiento de datos                 | Pág. 6  |
| 5.7.- Validación de la MAPA                                   | Pág. 6  |
| 5.8.- Interpretación de resultados y entrega de documentación | Pág. 7  |
| 5.9.- Criterios de derivación al médico                       | Pág. 8  |
| 5.10.- Evaluación de la MAPA y estudio estadístico            | Pág. 8  |
| 5.11.- Seguimiento del paciente                               | Pág. 8  |
| <b>ANEXOS</b>                                                 | Pág. 9  |
| Anexo I.- Modelo de Autorización del paciente                 | Pág. 10 |
| Anexo II.- Hoja de recogida de datos                          | Pág. 11 |
| Anexo III.- Modelo de comunicación de resultados al médico    | Pág. 12 |
| Anexo IV.- Dispositivo para realizar la MAPA                  | Pág. 13 |
| Anexo V.- Formulario web para estudio estadístico             | Pág. 19 |
| <b>BIBLIOGRAFÍA</b>                                           | Pág. 22 |

|                                                            |                                                                                                                                                                                                                                    |
|------------------------------------------------------------|------------------------------------------------------------------------------------------------------------------------------------------------------------------------------------------------------------------------------------|
| Edición 1 / Junio 2014                                     | Editado, revisado y aprobado por:<br><br>Alonso Gallego, Eva (COF Huelva)<br>Figueroa Pulido, Patricia (CACOF)<br>Macías González, Cristina (COF Cádiz)<br>Marín Magán, Fco. José (COF Cádiz)<br>Virués Ávila, Alberto (COF Cádiz) |
| Edición 2 / Octubre 2014<br>Sesión formativa 14 oct./14    |                                                                                                                                                                                                                                    |
| Edición 3 / Noviembre 2014<br>Pilotaje dic./14-ene./15     |                                                                                                                                                                                                                                    |
| Edición 4 / Junio 2015<br>Talleres de Formación MAPAfarma® |                                                                                                                                                                                                                                    |

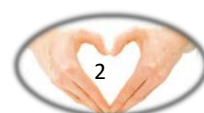

|          |                                                                                                        |                                                                                    |                                                                                                                                                  |
|----------|--------------------------------------------------------------------------------------------------------|------------------------------------------------------------------------------------|--------------------------------------------------------------------------------------------------------------------------------------------------|
| Logo COF | Programa de formación y acreditación en<br>Monitorización Ambulatoria de la<br>Presión Arterial (MAPA) |  | <br>Consejo Andaluz de Colegios Oficiales<br>de Farmacéuticos |
|----------|--------------------------------------------------------------------------------------------------------|------------------------------------------------------------------------------------|--------------------------------------------------------------------------------------------------------------------------------------------------|

## 1.- Objetivo

Definir y planificar el proceso de monitorización ambulatoria de la presión arterial (MAPA), mediante un dispositivo de monitorización, de tal forma que se asegure una correcta técnica de uso, información adecuada y derivación al médico, en caso necesario.

## 2.- Definiciones

- ♥ **Presión arterial (PA):** Es la presión que ejerce la sangre contra la pared de las arterias.  
[PAS = Presión Arterial Sistólica / PAD = Presión Arterial Diastólica]
- ♥ **Monitorización ambulatoria de la presión arterial (MAPA):** Es el registro de las cifras de PA de forma continua durante un determinado período de tiempo preestablecido. Permite obtener un amplio número de lecturas de PA, usualmente cada 20 o 30 minutos, durante periodos de 24 o 48 horas, que reflejan con detalle, sin la influencia del EBB (Efecto bata blanca), los cambios dinámicos de PA durante la actividad cotidiana del paciente.
- ♥ **Holter de tensión arterial:** Aparato formado por un esfigmomanómetro portátil (que mide las cifras de tensión arterial) conectado a un grabador en el cual quedan registrados los datos obtenidos para su análisis posterior.
- ♥ **Farmacéutico responsable:** Es el farmacéutico encargado de realizar todo el proceso de monitorización y evaluación de los resultados.
- ♥ **Paciente:** Es la persona a la que va dirigido todo el proceso.

## 3.- Criterios generales para MAPA

### 3.1.- Criterios de inclusión del paciente:

- Sospecha de HTA aislada en la consulta o clínica aislada (“Efecto bata blanca”).
- Variabilidad considerable de la PA en la consulta, durante la misma o en diferentes visitas.
- Pacientes con mal control de la PA con tratamiento farmacológico.
- Sospecha de HTA enmascarada.
- Sospecha de episodios de hipotensión, especialmente en ancianos y diabéticos.
- Presión arterial elevada en embarazo y con sospecha de preeclampsia.
- Pacientes de alto riesgo CV.
- Sospecha de alteraciones del sueño, como por ejemplo, apnea obstructiva del sueño.
- Obesidad y Síndrome Metabólico.

### 3.2.- Criterios de exclusión del paciente:

- Fibrilación auricular, arritmias, taquicardia (puesto que MAPA es oscilométrico y da error). Los pacientes con arritmias cardíacas, principalmente fibrilación auricular, tienen mayor dificultad para su realización, teniendo en cuenta que el monitor utiliza la técnica oscilométrica para la detección de la PA.
- No cooperación del paciente o que no quiera/pueda participar (limitaciones físicas, cognitivas, enfermedad de Parkinson u otro temblor).

|          |                                                                                                        |                                                                                    |                                                                                                                                                  |
|----------|--------------------------------------------------------------------------------------------------------|------------------------------------------------------------------------------------|--------------------------------------------------------------------------------------------------------------------------------------------------|
| Logo COF | Programa de formación y acreditación en<br>Monitorización Ambulatoria de la<br>Presión Arterial (MAPA) |  | <br>Consejo Andaluz de Colegios Oficiales<br>de Farmacéuticos |
|----------|--------------------------------------------------------------------------------------------------------|------------------------------------------------------------------------------------|--------------------------------------------------------------------------------------------------------------------------------------------------|

- Intolerancia al monitor y/o manguito.
- PA superior a 180/110 mmHg.
- Previsión de horarios irregulares durante la MAPA.
- Circunferencia brazo > 42 cm.
- Sospecha de manipulación no adecuada del medidor.

#### 4.- Equipamiento

- ✓ **Zona de atención personalizada (ZAP):** La Oficina de Farmacia ha de tener una zona separada de la zona de dispensación, para atender al paciente de manera reservada y, así, garantizar la confidencialidad de la entrevista.
- ✓ **Equipo de monitorización:** equipo de monitorización o Holter de tensión arterial, que ha de estar validado, siguiendo los protocolos internacionales estandarizados.  
En [www.dablededucational.org](http://www.dablededucational.org), o a través de [www.SEL-LEHTA](http://www.SEL-LEHTA), se mantiene al día un listado de aquéllos que los cumplen. Los dispositivos deben ser calibrados de forma periódica, al menos anualmente.

Dicho equipo está constituido por:

- Monitor para registro y almacenamiento de datos, alimentado con pilas alcalinas.
- Manguitos que detectan la presión arterial (PA), generalmente por método oscilométrico, aunque pueden existir modelos que lo hagan por el método auscultatorio e incluso mixto.
- Funda y arneses de sujeción.
- Equipo informático con software y cable de conexión que permita la descarga y almacenamiento de los datos que registra el monitor.

#### 5.- Descripción del proceso.

##### 5.1.- Información al paciente:

Se informa al paciente, de forma clara y sencilla:

- En qué consiste MAPAfarma® y cuál será el proceso a seguir.
- Por qué se lo debe hacer (criterios de inclusión).
- Qué se va a medir.
- Cómo se va a medir.
- Cuánto tiempo va a durar la prueba.
- Qué tipo de informe se suministra.
- Por qué es necesario que su médico conozca los resultados.
- Que es un servicio remunerado.

##### 5.2.- Autorización del paciente (Anexo I):

Acordada la prestación del servicio, el siguiente paso es citar al paciente en la **Zona de Atención Personalizada (ZAP)** de la oficina de Farmacia, un día concreto y a una hora determinada, para la colocación del aparato de medida de la PA.

**Mediante la firma del Modelo de Autorización (Anexo I), el paciente autoriza al farmacéutico responsable a la realización de la prueba, así como el uso de sus datos, según establece la Ley Orgánica de Protección de Datos.** (Advertencia: El fichero correspondiente deberá ser dado de alta por la Oficina de Farmacia).

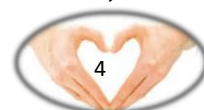

|          |                                                                                                        |                                                                                    |                                                                                                                                                  |
|----------|--------------------------------------------------------------------------------------------------------|------------------------------------------------------------------------------------|--------------------------------------------------------------------------------------------------------------------------------------------------|
| Logo COF | Programa de formación y acreditación en<br>Monitorización Ambulatoria de la<br>Presión Arterial (MAPA) |  | <br>Consejo Andaluz de Colegios Oficiales<br>de Farmacéuticos |
|----------|--------------------------------------------------------------------------------------------------------|------------------------------------------------------------------------------------|--------------------------------------------------------------------------------------------------------------------------------------------------|

### 5.3.- Recogida de datos del paciente (Anexo II):

- Hay algunos datos del paciente que son necesarios para programar el dispositivo:
  - Nombre y apellidos
  - Edad
  - Hora de levantarse y acostarse
  - Si duerme siesta
- Con carácter previo a la colocación del aparato de MAPA, al paciente se le deberá tomar la tensión y anotar los siguientes datos, para luego incluirlos en el cuestionario: PAS, PAD y FC (Realizar la toma aislada de PA en ambos brazos y elegir el valor mayor).
- Además, si no aportara analítica reciente, conviene realizar medida capilar en mg/dl para conocer colesterol total.
- Teléfono y/o correo electrónico, por si es necesario contactar con el paciente.

### 5.4.- Programación y colocación del dispositivo.

Programación: Una vez instalado el software del equipo (ver instrucciones en Anexo IV), el monitor debe programarse. (Por defecto se presentan unos valores de PA que habrá que ajustar a los límites considerados actualmente como diagnósticos de HTA):

- En el ordenador, crear un **plan de monitorización** de acuerdo al estilo de vida del paciente:
  - Datos del paciente: nombre, apellidos, edad, sexo.
  - Adaptar los periodos de actividad y descanso al horario del paciente.
  - Programar las medidas con un intervalo no superior a los 30 minutos (20 min. en actividad y 30 min. en descanso).
  - Programar un aviso acústico previo a la medida de PA. Solo en periodo de actividad.
  - También puede programarse la visualización de la medida de PA (no recomendado)
- Conectar el monitor al ordenador.
- Enviar el plan de monitorización del ordenador al monitor.

Colocación (ver instrucciones en el Anexo IV):

- Comprobar el perímetro del brazo antes de colocar el manguito (tamaño adecuado)
- Se coloca el manguito en el brazo no dominante (si la persona es diestra, se coloca en el brazo izquierdo y viceversa).
- El monitor se puede sujetar a la cintura con arneses.

Información al paciente:

Los pacientes deben conocer:

- La potencial incomodidad de la MAPA, especialmente durante el sueño.
- La frecuencia de muestreo programada.
- La activación de la «función ciega», de manera que la no aparición de la cifra de PA en la pantalla no sea interpretada como mal funcionamiento del dispositivo de MAPA.
- La característica programada en la mayoría de dispositivos de MAPA de repetir automáticamente la medida de la PA aproximadamente a los 2 minutos después de un error de medida.

|          |                                                                                                        |                                                                                    |                                                                                                                                                  |
|----------|--------------------------------------------------------------------------------------------------------|------------------------------------------------------------------------------------|--------------------------------------------------------------------------------------------------------------------------------------------------|
| Logo COF | Programa de formación y acreditación en<br>Monitorización Ambulatoria de la<br>Presión Arterial (MAPA) |  | <br>Consejo Andaluz de Colegios Oficiales<br>de Farmacéuticos |
|----------|--------------------------------------------------------------------------------------------------------|------------------------------------------------------------------------------------|--------------------------------------------------------------------------------------------------------------------------------------------------|

Los pacientes deber ser instruidos específicamente para:

- Mantener el manguito de medida de PA a nivel del corazón, no hablar ni moverse y permanecer tranquilo con el brazo extendido e inmóvil cuando se esté realizando una medida, es decir, mantener el brazo quieto y relajado y respirar normalmente cada vez que el manguito comience a hincharse (y saber que, en caso de fallo de la lectura, el aparato la volverá a repetir);
- Colocar y ajustar apropiadamente el manguito en el brazo no dominante.
- Preferentemente, utilizar una prenda de algodón fina bajo el manguito para minimizar el riesgo de equimosis y así aumentar el cumplimiento, (o, como alternativa más higiénica, colocar sobre el brazo vendaje tubular con elástico, y encima el dispositivo).
- Apagar el dispositivo de MAPA cada vez que se retira, por ejemplo, para ducharse o bañarse, cambiar de ropa, etc., y encenderlo de nuevo después.
- Mantener el dispositivo de MAPA encendido durante el reposo nocturno, y no apagarlo.
- Continuar con las actividades rutinarias usuales con restricciones mínimas, pero mantener un horario similar para los periodos de actividad-reposo, y evitar dormir la siesta durante el día que se está realizando la prueba de MAPA, y anotando dicha hora si no es posible.
- Evitar actividades que pueden interferir con el funcionamiento del dispositivo de MAPA o con la medida precisa de la PA (actividades acuáticas, ejercicio físico extenuante, etc.).
- Rellenar todos los ítems requeridos en el **diario de actividades**: Los pacientes deber rellenar un diario donde se registre la hora de acostarse por la noche, la hora de levantarse por la mañana, horas de las comidas, la/s hora/s de toma o ingesta de cualquier medicación, realización de ejercicio físico, y episodios de actividad física inusual, estados de alteración emocional u otros eventos atípicos que puedan afectar la PA, así como otros acontecimientos inusuales y cómo se descansó durante el día en el que transcurrió la MAPA (El CACOF ha diseñado un díptico u “Hoja de información al paciente MAPA y diario de actividades”, que deberá ser entregado al paciente en la farmacia, y que será devuelto junto con el aparato al término de la MAPA)
- Fecha y hora precisas en que tienen que devolver el dispositivo de MAPA a la farmacia.

#### 5.5.- Retirada del dispositivo (ver instrucciones en el Anexo IV).

El paciente deberá acudir a la farmacia el día y a la hora acordado, para la retirada del dispositivo y debe entregar su Diario de actividades.

#### 5.6.-Transferencia y almacenamiento de datos (ver instrucciones en el Anexo IV).

Tras la retirada del equipo se obtiene un registro que aporta una serie de valores. Los datos registrados en el monitor se vuelcan en el Programa (software del dispositivo), previamente instalado en el ordenador, a través de una conexión específica que se incluye en el equipo de MAPA.

#### 5.7.- Validación de la MAPA

Según la ESH (2007) el registro obtenido es válido si:

- El paciente ha realizado sus actividades diarias habituales.
- Se han obtenido al menos el 70% de las medidas programadas, estando representadas por igual las del periodo de actividad y de descanso.
- Se han realizado tomas de PA al menos 1 vez/hora durante todo el periodo de análisis.
- El informe se ha ajustado al periodo de actividad y descanso específico del paciente.



|          |                                                                                                        |               |                                                                                                                                                  |
|----------|--------------------------------------------------------------------------------------------------------|---------------|--------------------------------------------------------------------------------------------------------------------------------------------------|
| Logo COF | Programa de formación y acreditación en<br>Monitorización Ambulatoria de la<br>Presión Arterial (MAPA) | MAPA<br>farma | <br>Consejo Andaluz de Colegios Oficiales<br>de Farmacéuticos |
|----------|--------------------------------------------------------------------------------------------------------|---------------|--------------------------------------------------------------------------------------------------------------------------------------------------|

## 5.8.- Interpretación de resultados y entrega de documentación al paciente.

Tras la realización de la prueba se hace necesario elaborar el informe de la monitorización ambulatoria de la presión arterial y derivarlo para una correcta interpretación por parte del profesional médico. Se facilita un modelo de comunicación al médico u otros profesionales sanitarios (**ANEXO III**), que puede utilizarse a título informativo del servicio que se está prestando desde las oficinas de farmacias o para adjuntarlo al informe de MAPA del paciente.

### Clasificación y criterios diagnósticos de MAPA

#### Criterios de normalidad

|           |          |       |
|-----------|----------|-------|
| PAS Media | Diurna   | < 135 |
|           | Nocturna | < 120 |
|           | 24 horas | < 130 |
| PAD Media | Diurna   | < 85  |
|           | Nocturna | < 70  |
|           | 24 horas | < 80  |

**Presión de pulso:** Es la diferencia entre la PAS y la PAD; de entrada no se incorpora en el informe de resumen de resultados.

Generalmente elevada en Hipertensión Sistólica aislada, típica del anciano.

Promedio 24 horas  $\leq$  60 mmHg

**Cargas:** Se considera anormal la presencia de un 40% o más de registros por encima de valores normales de PA, ya que esta cifra se correlaciona con daño en órganos diana.

El resultado que habrá que tener en cuenta es el valor conjunto: como el resultado obtenido se refiere a cada valor de Sistólica o Diastólica individualmente, se valorará en su conjunto haciendo referencia al “Peor” valor obtenido de ambos.

Por ejemplo, si un paciente registra una carga de 45% en la Sistólica y un 10% en la Diastólica, el resultado de la prueba es que su carga es de 45%.

**Ciclo Circadiano:** Es la evolución que sufre la PA del día a la noche, y la relación de estos cambios con la medicación que recibe el paciente.

Paciente **NO-DIPPER:** tiene caídas de PAS y PAD entre 0-10%.

Paciente **DIPPER:** cuando su PAS y PAD nocturnas caen entre un 10-20%.

Paciente **DIPPER EXTREMO:** si la caída supera el 20%

Paciente **RISER:** cuando tiene valores de PAS y PAD mayores en el periodo nocturno.

**Frecuencia Cardíaca:** Interesa para la elección de la terapia farmacológica. A veces, cifras muy elevadas de frecuencia cardíaca están relacionadas con registros erróneos, por lo que deben ser consideradas cuando existan síntomas o constatación de episodios de taquicardia. También es interesante observar su respuesta a valores bajos de PA como respuesta compensatoria a éstos, muy útil para fenómenos de Hipotensión Arterial.

**Criterios de Hipotensión Arterial:** Con cierta frecuencia se realiza este examen para evaluar hipotensión arterial asociada o no a fármacos, siempre que se acompañen de síntomas. Los criterios para considerar hipotensión arterial son:

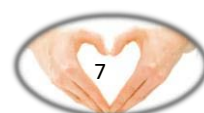

|          |                                                                                                        |                |                                                                                                                                                  |
|----------|--------------------------------------------------------------------------------------------------------|----------------|--------------------------------------------------------------------------------------------------------------------------------------------------|
| Logo COF | Programa de formación y acreditación en<br>Monitorización Ambulatoria de la<br>Presión Arterial (MAPA) | MAPA<br>farma® | <br>Consejo Andaluz de Colegios Oficiales<br>de Farmacéuticos |
|----------|--------------------------------------------------------------------------------------------------------|----------------|--------------------------------------------------------------------------------------------------------------------------------------------------|

|                                 |         |          |
|---------------------------------|---------|----------|
| Promedio de presiones diurnas   | Hombres | < 110/65 |
|                                 | Mujeres | < 98/61  |
| Promedio de presiones nocturnas | Hombres | < 84/45  |
|                                 | Mujeres |          |

Los informes de resultados de todas las pruebas de Monitorización de la Presión Arterial de 24 horas realizados por las farmacias serán derivados al personal médico prescriptor de la prueba para su evaluación y diagnóstico

### 5.9.- Criterios de derivación al médico:

Aunque en principio sería de interés derivar siempre los resultados del MAPA al médico, sí hay ciertas ocasiones en que esto será de primordial importancia:

- Pacientes que habiendo realizado MAPA dan como resultado pacientes no-dipper o riser.
- Pacientes que habiendo realizado MAPA tienen una carga de PA superior al 40%.
- Pacientes que habiendo realizado MAPA dan una PA inferior a 65 mmHg.

### 5.10.- Evaluación del MAPA por el paciente y estudio estadístico (Imprescindible en los 5 pacientes necesarios para la acreditación):

Mientras los datos se están transfiriendo desde el aparato de MAPA al ordenador de la farmacia, el farmacéutico responsable realizará unas sencillas preguntas al paciente sobre el servicio, de carácter anónimo, a través del formulario web elaborado por el CACOF, con objeto de obtener estadísticas generales sobre el resultado del MAPA. (Enlace en [www.cacof.es](http://www.cacof.es))

Posteriormente, el farmacéutico completará el cuestionario con los datos obtenidos en la MAPA.

El cuestionario también se podrá realizar en papel, si resulta más sencillo, debiendo a posteriori introducir los datos en el formulario web.

### 5.11.- Seguimiento del paciente.

El farmacéutico responsable, bajo su criterio, acordará con el paciente futuras visitas de seguimiento, con la finalidad de un mejor control de la PA, así como valoración del riesgo cardiovascular asociado a ésta.



|          |                                                                                                        |                                                                                    |                                                                                                                                                  |
|----------|--------------------------------------------------------------------------------------------------------|------------------------------------------------------------------------------------|--------------------------------------------------------------------------------------------------------------------------------------------------|
| Logo COF | Programa de formación y acreditación en<br>Monitorización Ambulatoria de la<br>Presión Arterial (MAPA) |  | <br>Consejo Andaluz de Colegios Oficiales<br>de Farmacéuticos |
|----------|--------------------------------------------------------------------------------------------------------|------------------------------------------------------------------------------------|--------------------------------------------------------------------------------------------------------------------------------------------------|

## ANEXOS

- Anexo I:** Hoja de recogida de datos del paciente
- Anexo II:** Modelo de autorización del paciente
- Anexo III:** Modelo de comunicación de resultados al médico/otro profesional sanitario
- Anexo IV:** Instrucciones del Dispositivo para realizar la MAPA en el Programa MAPAfarma®

|          |                                                                                                        |                |                                                                                                                                                  |
|----------|--------------------------------------------------------------------------------------------------------|----------------|--------------------------------------------------------------------------------------------------------------------------------------------------|
| Logo COF | Programa de formación y acreditación en<br>Monitorización Ambulatoria de la<br>Presión Arterial (MAPA) | MAPA<br>farma® | <br>Consejo Andaluz de Colegios Oficiales<br>de Farmacéuticos |
|----------|--------------------------------------------------------------------------------------------------------|----------------|--------------------------------------------------------------------------------------------------------------------------------------------------|

## ANEXO I

### Modelo de Autorización del paciente

Logo COF

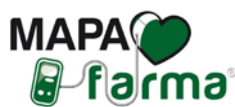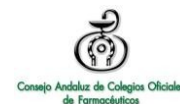

### Autorización del paciente para la realización de la Monitorización Ambulatoria de la Presión Arterial (MAPA)

D/D<sup>a</sup>. \_\_\_\_\_, con DNI \_\_\_\_\_ y  
domicilio en \_\_\_\_\_, Calle \_\_\_\_\_,  
Nº \_\_\_\_\_, Teléfono \_\_\_\_\_ Email \_\_\_\_\_

- **AUTORIZO** a la farmacia \_\_\_\_\_ a realizar la **Monitorización Ambulatoria de la Presión Arterial (MAPA)**. Para ello, doy mi permiso para la colocación de un dispositivo electrónico o Holter de tensión y para registrar mis datos farmacéuticos, personales y de salud, de los que no se hará otro uso sin mi consentimiento expreso.
- MANIFIESTO haber sido informado/a de todo el proceso de realización de dicha monitorización y que en este momento recibo, en perfecto estado, el dispositivo para Monitorización Ambulatoria de la Presión Arterial M24/7
- Igualmente, ME COMPROMETO a devolverlo a la farmacia en la fecha acordada (aproximadamente 24 horas desde la recepción) y me responsabilizo de mantenerlo en perfecto estado y condiciones de uso, comunicando a la farmacia de forma inmediata cualquier incidencia relacionada con el aparato.

Por su parte, el titular de la farmacia, D./D<sup>a</sup>. \_\_\_\_\_, con  
DNI \_\_\_\_\_, se compromete a:

- Mantener la privacidad de los datos personales y farmacológicos.
- Realizar la actividad del proceso siguiendo las normas establecidas en el Procedimiento Normalizado de Trabajo (PNT) del programa MAPAfarma®, y por el personal cualificado para ello.
- Hacer una valoración de los resultados obtenidos y proporcionar copia de éstos al paciente.

En \_\_\_\_\_, a \_\_\_\_\_ de \_\_\_\_\_ de 201\_\_.

Firma:

El paciente,

El farmacéutico,

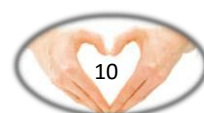

|          |                                                                                                        |                                                                                    |                                                                                                                                                  |
|----------|--------------------------------------------------------------------------------------------------------|------------------------------------------------------------------------------------|--------------------------------------------------------------------------------------------------------------------------------------------------|
| Logo COF | Programa de formación y acreditación en<br>Monitorización Ambulatoria de la<br>Presión Arterial (MAPA) |  | <br>Consejo Andaluz de Colegios Oficiales<br>de Farmacéuticos |
|----------|--------------------------------------------------------------------------------------------------------|------------------------------------------------------------------------------------|--------------------------------------------------------------------------------------------------------------------------------------------------|

De acuerdo con lo establecido en la Ley Orgánica 15/1999, de Protección de Datos Personales, los datos que se faciliten se incorporarán al fichero de la farmacia con la única finalidad de ofrecer una mejor asistencia sanitaria y atención farmacéutica.

## ANEXO II

### Hoja de recogida de datos del paciente

Logo COF

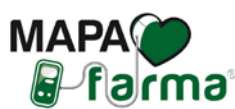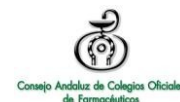

### Hoja de Recogida de datos del paciente

### Monitorización Ambulatoria de la Presión Arterial (MAPA)

Nombre:

Apellidos:

Edad:

Teléfono:

Correo electrónico:

Hora habitual de levantarse:

Hora habitual de acostarse:

¿Duerme siesta normalmente?

Horario de la siesta:

PA aislada:

Frecuencia cardiaca:

Colesterol total:

Otros datos de interés:

De acuerdo con lo establecido en la Ley Orgánica 15/1999, de Protección de Datos Personales, los datos que se faciliten se incorporarán al fichero de la farmacia con la única finalidad de ofrecer una mejor asistencia sanitaria y atención farmacéutica.

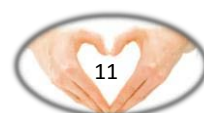

|          |                                                                                                        |                                                                                    |                                                                                                                                                  |
|----------|--------------------------------------------------------------------------------------------------------|------------------------------------------------------------------------------------|--------------------------------------------------------------------------------------------------------------------------------------------------|
| Logo COF | Programa de formación y acreditación en<br>Monitorización Ambulatoria de la<br>Presión Arterial (MAPA) |  | <br>Consejo Andaluz de Colegios Oficiales<br>de Farmacéuticos |
|----------|--------------------------------------------------------------------------------------------------------|------------------------------------------------------------------------------------|--------------------------------------------------------------------------------------------------------------------------------------------------|

### ANEXO III

#### Modelo de comunicación de resultados al médico/otro profesional sanitario

Logo COF

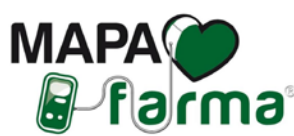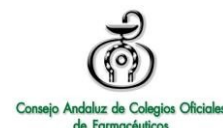

#### Resumen de resultados de la Monitorización Ambulatoria de la Presión Arterial (MAPA)

Paciente: \_\_\_\_\_

Según informe adjunto, se resaltan los resultados obtenidos:

Valores límites

**Presión Arterial Media 24h:** \_\_\_\_\_ mmHg (130/80 mmHg)

**Presión Arterial Media periodo de Actividad (Día):** \_\_\_\_\_ mmHg (135/85 mmHg)

**Presión Arterial Media periodo de Descanso (Noche):** \_\_\_\_\_ mmHg (120/70 mmHg)

**Lecturas totales:** \_\_\_\_\_

**Lecturas correctas:** \_\_\_\_\_ %  
(>70%)

**Carga de Presión Arterial** (% de mediciones por encima de los valores límites):

Lecturas Diurnas  $\geq$  135/85: \_\_\_\_\_ % (< 40%)

Lecturas Nocturnas  $\geq$  120/70: \_\_\_\_\_ % (< 40%)

**Periodo nocturno % Dip:**

Sis: \_\_\_\_\_ % Días: \_\_\_\_\_ %

**Clasificación de Variabilidad (D/N):**

Dipper (10-20% de disminución nocturna) ☐

Non-Dipper (< 10% de disminución nocturna) ☐

Dipper extremo (> 20% de disminución nocturna) ☐

Riser (elevación nocturna) ☐

**Comentarios:**

Firma y sello de la farmacia:

Fecha: \_\_\_\_\_

Ldo./a.: \_\_\_\_\_ N° Col: \_\_\_\_\_

De acuerdo con lo establecido en la Ley Orgánica 15/1999, de Protección de Datos Personales, los datos que se faciliten se incorporarán al fichero de la farmacia con la única finalidad de ofrecer una mejor asistencia sanitaria y atención farmacéutica.

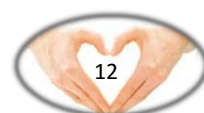

|          |                                                                                                        |                |                                                                                                                                                  |
|----------|--------------------------------------------------------------------------------------------------------|----------------|--------------------------------------------------------------------------------------------------------------------------------------------------|
| Logo COF | Programa de formación y acreditación en<br>Monitorización Ambulatoria de la<br>Presión Arterial (MAPA) | MAPA<br>farma® | <br>Consejo Andaluz de Colegios Oficiales<br>de Farmacéuticos |
|----------|--------------------------------------------------------------------------------------------------------|----------------|--------------------------------------------------------------------------------------------------------------------------------------------------|

#### ANEXO IV

#### Dispositivo para realizar la MAPA en el Programa MAPAfarma®

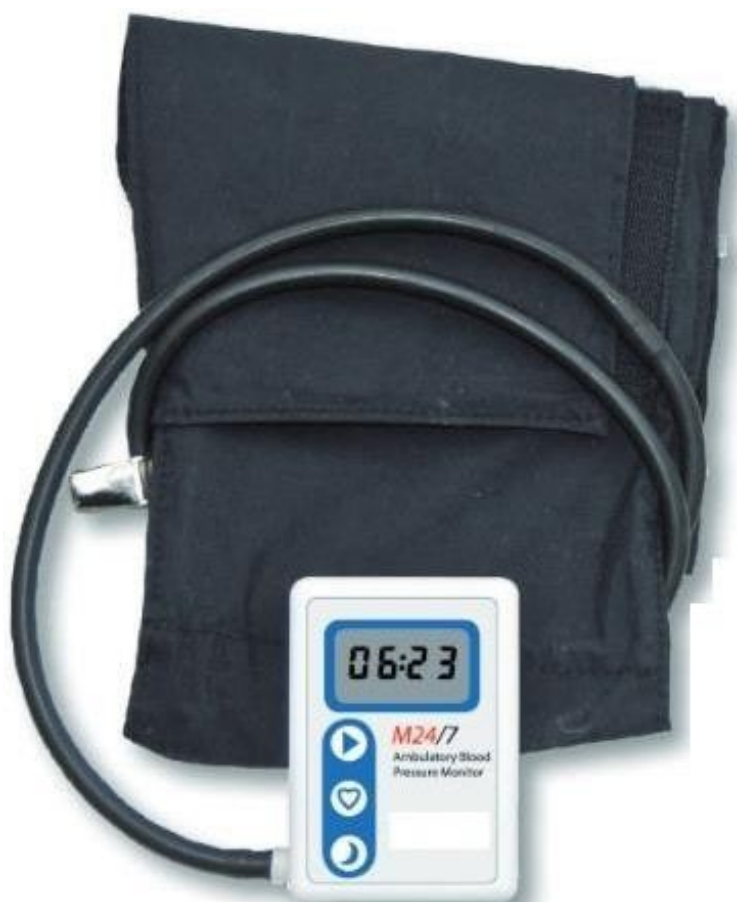

|          |                                                                                                        |                                                                                    |                                                                                                                                                  |
|----------|--------------------------------------------------------------------------------------------------------|------------------------------------------------------------------------------------|--------------------------------------------------------------------------------------------------------------------------------------------------|
| Logo COF | Programa de formación y acreditación en<br>Monitorización Ambulatoria de la<br>Presión Arterial (MAPA) |  | <br>Consejo Andaluz de Colegios Oficiales<br>de Farmacéuticos |
|----------|--------------------------------------------------------------------------------------------------------|------------------------------------------------------------------------------------|--------------------------------------------------------------------------------------------------------------------------------------------------|

Página 1

## Guía rápida de uso del Monitor de presión arterial ambulatoria y Programa de registro de la presión arterial M24/7

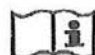

### Información importante sobre seguridad

Utilice este documento únicamente como guía rápida de consulta. Si es la primera vez que utiliza el dispositivo y el software, lea detenidamente y al completo los manuales de instrucciones del M24/7 y del programa de registro de la presión arterial.

#### Parte delantera

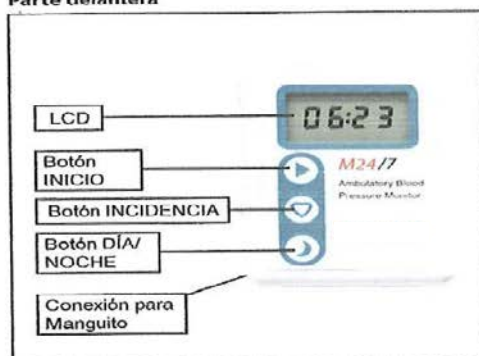

#### Parte trasera

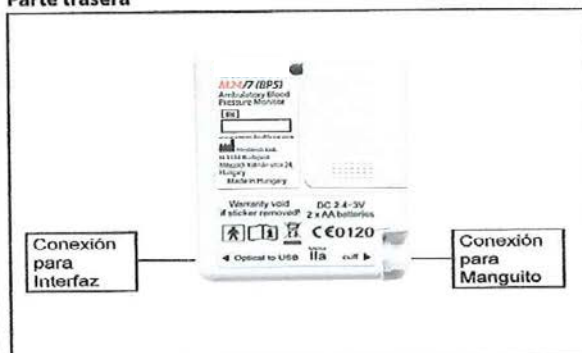

#### Pantalla

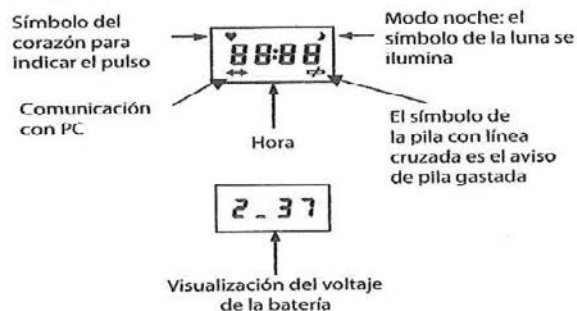

El juego incluye 2 manguitos para adultos:  
Talla normal (24-32 cm)  
Talla grande (32-42 cm)  
Disponibles de modo opcional: manguito pequeño



|          |                                                                                                        |                                                                                    |                                                                                                                                                  |
|----------|--------------------------------------------------------------------------------------------------------|------------------------------------------------------------------------------------|--------------------------------------------------------------------------------------------------------------------------------------------------|
| Logo COF | Programa de formación y acreditación en<br>Monitorización Ambulatoria de la<br>Presión Arterial (MAPA) |  | <br>Consejo Andaluz de Colegios Oficiales<br>de Farmacéuticos |
|----------|--------------------------------------------------------------------------------------------------------|------------------------------------------------------------------------------------|--------------------------------------------------------------------------------------------------------------------------------------------------|

## Página 2

### Instalación del programa de registro de la presión arterial

(Para obtener detalles sobre la instalación, consulte el manual del programa de registro de la presión arterial)  
Deberá seguir los pasos siguientes:

- lea y acepte el acuerdo de licencia
- seleccione el archivo de destino para la instalación
- elija la carpeta del menú Inicio para los accesos directos habituales (iconos de arranque, ayuda y desinstalar) del programa de registro de la presión arterial.
- al finalizar la instalación, la configuración del programa de registro de la presión arterial creará un icono de arranque en el escritorio.

### Inicio

Al inicio del programa de registro de la presión arterial, entrará como administrador del sistema, y como tal, podrá agregar usuarios nuevos o modificar los niveles de acceso a los datos. El administrador del sistema no puede ver los datos médicos. Su tarea consiste en gestionar las cuentas de los usuarios. Sólo el usuario tiene acceso a las mediciones. Éstos son los pasos a seguir:

- **Pantalla de bienvenida**
- **Ajustes del administrador del sistema:** Su nombre de usuario y contraseña predeterminados son **admin/admin**. Puede cambiarlos para evitar problemas con el sistema de seguridad.
- **Agregar nuevo usuario:** Aquí deberá crear una cuenta de usuario rellenando los espacios en blanco.
- **Modifique el encabezado predeterminado del informe:** Podrá cambiar los datos del encabezado del informe, que aparece en la parte superior de todas las páginas impresas.

### Cómo programar el monitor M24/7

**Pilas:** Introduzca o cambie las pilas antes de cada sesión de monitorización para que el dispositivo de registro funcione correctamente cuando haya valores de presión arterial extremadamente altos o mediciones de alta frecuencia.

#### Programación del dispositivo M24/7:

- con un PC: abra el programa de registro de la presión arterial
- sin un PC: consulte la programación manual en el Manual de instrucciones

Introduzca los datos de nuevo paciente  o seleccione un paciente de la base de datos 

Cree un plan de monitorización de acuerdo al estilo de vida del paciente

#### Ajustes de presión arterial: le permite

- ajuste la hora de inicio y de fin del día/de la noche/de la mañana/de periodos especiales
- seleccione los intervalos de las mediciones

|          |                                                                                                        |                                                                                    |                                                                                                                                                  |
|----------|--------------------------------------------------------------------------------------------------------|------------------------------------------------------------------------------------|--------------------------------------------------------------------------------------------------------------------------------------------------|
| Logo COF | Programa de formación y acreditación en<br>Monitorización Ambulatoria de la<br>Presión Arterial (MAPA) |  | <br>Consejo Andaluz de Colegios Oficiales<br>de Farmacéuticos |
|----------|--------------------------------------------------------------------------------------------------------|------------------------------------------------------------------------------------|--------------------------------------------------------------------------------------------------------------------------------------------------|

### Página 3

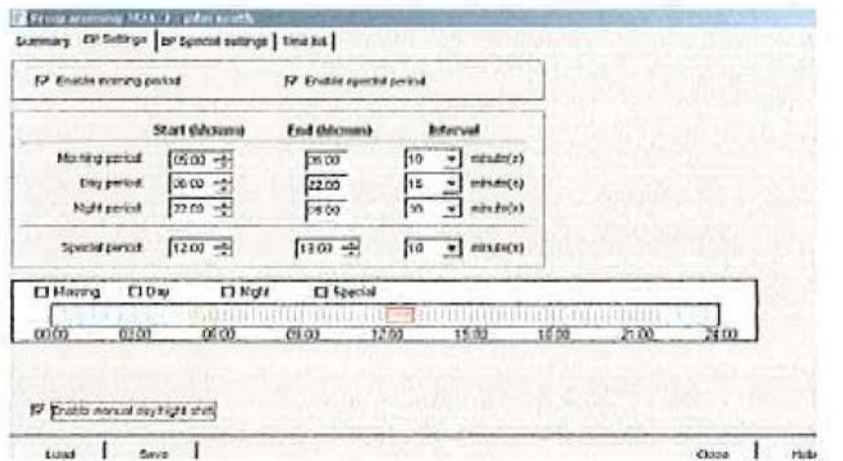

Summary | BP Settings | BP Special settings | Time list

☐ Enable morning period    ☐ Enable special period

|                | Start (hh:mm) | End (hh:mm) | Interval   |
|----------------|---------------|-------------|------------|
| Morning period | 05:00         | 06:00       | 10 minutes |
| Day period     | 06:00         | 22:00       | 15 minutes |
| Night period   | 22:00         | 05:00       | 30 minutes |
| Special period | 12:00         | 13:00       | 10 minutes |

☐ Morning   ☐ Day   ☐ Night   ☒ Special

00:00   01:00   02:00   03:00   04:00   05:00   06:00   07:00   08:00   09:00   10:00   11:00   12:00   13:00   14:00   15:00   16:00   17:00   18:00   19:00   20:00   21:00   22:00   23:00   24:00

☐ Enable manual day/night shift

Load   Save   Close   Help

  

Summary | BP Settings | BP Special settings | Time list

Patient data

Name: Juan Smith  
ID: 01

Device data

Connected: Auto  
Serial number: ---  
State: ---

BP

Morning: 05:00 - 06:00 / 10 min  
Day: 06:00 - 22:00 / 15 min  
Night: 22:00 - 05:00 / 30 min  
Special: 12:00 - 13:00 / 10 min

Cuff type: Unknown  
Display: On  
Max pressure: 300 mmHg  
Measurements: 50 pcs

Time

Start: 23/07/2010 12:25  
Length: 27 hour

PC date and time: 23/07/2010 12:20

Send plan to device

Load   Save   Close   Help

Una vez finalizados los ajustes de la presión arterial

- conecte el dispositivo de registro M24/7 al ordenador
- envíe el plan de monitorización del ordenador al dispositivo M24/7.

#### Periodo de monitorización, generalmente 24 horas

- Informe al paciente de los objetivos y los resultados que se esperan de las mediciones.
- Entréguele la "Guía rápida de uso para el paciente" e informe al paciente en detalle sobre las normas y uso del dispositivo.
- El paciente deberá rellenar el diario del paciente.
- Colóquele el manguito al paciente con el dispositivo M24/7 dentro del estuche.
- Tras la sesión de monitorización, el paciente debería devolver el dispositivo

#### Lectura/descarga de los datos

- Desconecte y retire el manguito y el dispositivo del paciente y conecte el dispositivo al PC.
- Inicie el programa, haga clic en el botón  en la "Pantalla de inicio" y siga las instrucciones.

|          |                                                                                                        |                                                                                    |                                                                                                                                                  |
|----------|--------------------------------------------------------------------------------------------------------|------------------------------------------------------------------------------------|--------------------------------------------------------------------------------------------------------------------------------------------------|
| Logo COF | Programa de formación y acreditación en<br>Monitorización Ambulatoria de la<br>Presión Arterial (MAPA) |  | <br>Consejo Andaluz de Colegios Oficiales<br>de Farmacéuticos |
|----------|--------------------------------------------------------------------------------------------------------|------------------------------------------------------------------------------------|--------------------------------------------------------------------------------------------------------------------------------------------------|

Página 4

## Valoración de los datos y creación de informes

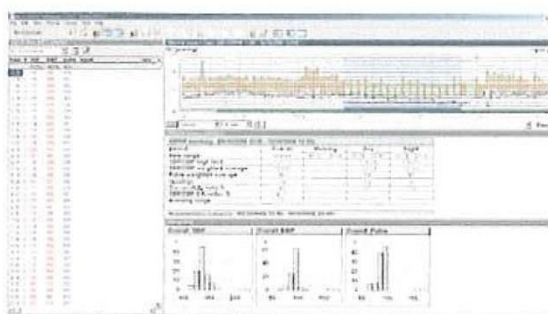

- Consulte los datos de la monitorización, el diario del paciente y pídale detalles al paciente si fuera necesario. En la pantalla "Evaluation" (valoración) podrá analizar los datos registrados.
- Existen 4 campos que pueden adaptarse (para más detalles, consulte el manual del programa de registro de la presión arterial)
  - Lista de datos
  - Gráfica de la presión arterial
  - Estadísticas de la presión arterial
  - Histograma

- Pulsando el botón  , puede volver al editor de informes, un procesador de texto en el que puede agregar anotaciones y donde el informe puede imprimirse.
- Los ajustes más importantes del software están disponibles en el menú "Herramientas/Opciones", haciendo clic en el botón "Opciones"  . Para obtener más detalles, consulte el manual del programa de registro de la presión arterial además de la "Ayuda" en línea.

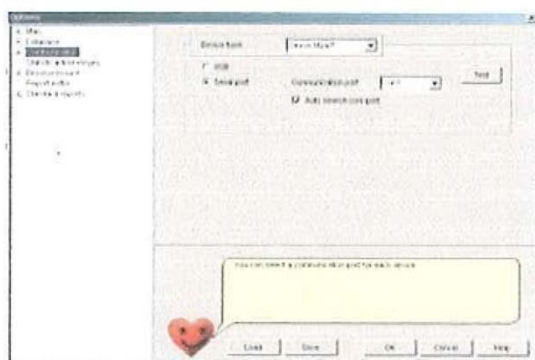



|          |                                                                                                  |                                                                                    |                                                                                                                                               |
|----------|--------------------------------------------------------------------------------------------------|------------------------------------------------------------------------------------|-----------------------------------------------------------------------------------------------------------------------------------------------|
| Logo COF | Programa de formación y acreditación en Monitorización Ambulatoria de la Presión Arterial (MAPA) |  | <br>Consejo Andaluz de Colegios Oficiales de Farmacéuticos |
|----------|--------------------------------------------------------------------------------------------------|------------------------------------------------------------------------------------|-----------------------------------------------------------------------------------------------------------------------------------------------|

### Símbolos generales, teclas de función

|                                                                                     |                                              |
|-------------------------------------------------------------------------------------|----------------------------------------------|
|    | reconocimiento del paciente seleccionado     |
|    | todos los pacientes                          |
|    | nueva carpeta                                |
|    | cambiar nombre de carpeta                    |
|    | borrar carpeta                               |
|    | actualizar acceso a carpeta                  |
|    | derechos de acceso a la carpeta seleccionada |
|    | nuevo reconocimiento                         |
|    | programación                                 |
|    | lectura de datos                             |
|  | agregar campo activo a este informe          |
|  | mostrar todos los campos                     |
|  | agregar informe estándar al informe          |
|  | filtrar la lista                             |
|  | gráfico de media horaria                     |
|  | editar anotación de elemento seleccionado    |

|          |                                                                                                  |                                                                                    |                                                                                                                                               |
|----------|--------------------------------------------------------------------------------------------------|------------------------------------------------------------------------------------|-----------------------------------------------------------------------------------------------------------------------------------------------|
| Logo COF | Programa de formación y acreditación en Monitorización Ambulatoria de la Presión Arterial (MAPA) |  | <br>Consejo Andaluz de Colegios Oficiales de Farmacéuticos |
|----------|--------------------------------------------------------------------------------------------------|------------------------------------------------------------------------------------|-----------------------------------------------------------------------------------------------------------------------------------------------|

## Bibliografía:

1. **GUÍA DE PRÁCTICA CLÍNICA DE LA ESH/ESC PARA EL MANEJO DE LA HIPERTENSIÓN ARTERIAL (2013).**  
 Revista HIPERTENSIÓN y RV. Volumen 30 - Extraordinario 3 - Diciembre 2013. [Hipertens riesgo vasc. 2013; 30 (Supl 3): 1] <http://www.seh-lelha.org/pdf/Guia2013.pdf>
2. **Guía Europea de Hipertensión 2013. Resumen y comentarios.**  
<http://www.seh-lelha.org/pdf/RESUMEN%20ESH%202013.pdf>
3. **Recomendaciones 2013 para el uso de la MAPA para el diagnóstico de hipertensión en adultos, valoración de riesgo cardiovascular y obtención de objetivos terapéuticos (resumen) ...**  
 [Revista Clin Invest Arterioscl. 2013; 25(2): 74-82.]  
[http://www.searteriosclerosis.org/resources/archivosbd/clinica\\_documentos\\_guias/77915ee9d9466f900f96a4ado881b090.pdf](http://www.searteriosclerosis.org/resources/archivosbd/clinica_documentos_guias/77915ee9d9466f900f96a4ado881b090.pdf)
4. **GUÍA ESPAÑOLA DE HIPERTENSIÓN ARTERIAL 2005.**  
 Revista HIPERTENSIÓN y RV. Volumen 22 – Suplemento 2 – Año 2005. [Hipertensión. 2005; 22 (Supl 2): 16-26. [http://www.seh-lelha.org/pdf/guia05\\_4.pdf](http://www.seh-lelha.org/pdf/guia05_4.pdf)]
5. **Protocolo HTA SEMI 2009 Pedro Armario.**  
<http://www.fesemi.org/documentos/1335540376/publicaciones/protocolos/protocolo-hipertension-arterial.pdf>
